# Supplementary material for: A Novel Probability Model for LncRNA–Disease Association Prediction Based on the Naïve Bayesian Classifier
Source: MDPI journal article supplement (doi:10.3390/genes9070345), 2018-07-08
Supplement: s1 [file s1]

Article

# A novel probability model for LncRNA-Disease Association Prediction based on the Naïve Bayesian Classifier

Jingwen Yu <sup>1</sup>, Pengyao Ping <sup>1</sup>, Lei Wang <sup>1,2\*</sup> , Linai Kuang <sup>1,2</sup>, Xueyong Li <sup>2</sup> and Zhelun Wu <sup>3</sup>

<sup>1</sup> Key Laboratory of Intelligent Computing & Information Processing, Xiangtan University, XiangTan 411105, People's Republic of China; jingwen-yu@qq.com; pengyao.ping@qq.com; wanglei@xtu.edu.cn; kla@xtu.edu.cn

<sup>2</sup> College of Computer Engineering & Applied Mathematics, Changsha University, Changsha 410001, Hunan, People's Republic of China; wanglei@xtu.edu.cn; kla@xtu.edu.cn; 137493255@qq.com

<sup>3</sup> Department of Computer Science, Princeton University, Princeton, New Jersey, USA; zhelunw@princeton.edu

\* Correspondence: wanglei@xtu.edu.cn; Tel.: +86-151-1110-9999

Academic Editor: name

Version June 24, 2018 submitted to Journal Not Specified

## 1. Method

### 1.1. Method for Applying the Naïve Bayesian Theory into $GN_1$

Based on the naïve Bayesian classifier, the posterior probabilities for an edge  $e_{l_i-d_j}$ , representing whether the node  $l_i$  is connected to  $d_j$  in  $GN_1$ , are defined as follows:

$$\begin{aligned} p(e_{l_i-d_j} = 1 | CN(l_i, d_j)) &= \frac{p(m_1, m_2, \dots, m_h | e_{l_i-d_j} = 1) p(e_{l_i-d_j} = 1)}{p(CN(l_i, d_j))} \\ &= \frac{p(e_{l_i-d_j} = 1)}{p(CN(l_i, d_j))} \prod_{m_\delta \in CN(l_i, d_j)} p(m_\delta | e_{l_i-d_j} = 1) \end{aligned} \quad (1)$$

$$\begin{aligned} p(e_{l_i-d_j} = 0 | CN(l_i, d_j)) &= \frac{p(m_1, m_2, \dots, m_h | e_{l_i-d_j} = 0) p(e_{l_i-d_j} = 0)}{p(CN(l_i, d_j))} \\ &= \frac{p(e_{l_i-d_j} = 0)}{p(CN(l_i, d_j))} \prod_{m_\delta \in CN(l_i, d_j)} p(m_\delta | e_{l_i-d_j} = 0). \end{aligned} \quad (2)$$

From Equations (1) and (2), we can directly identify whether an lncRNA node is connected with a disease node or not in  $GN_1$ . However, since it is often too complicated to calculate the value of  $p(CN(l_i, d_j))$ , we first define the probability of a potential association existing between  $l_i$  and  $d_j$  in  $GN_1$  as follows:

$$S1(l_i, d_j) = \frac{p(e_{l_i-d_j} = 1 | CN(l_i, d_j))}{p(e_{l_i-d_j} = 0 | CN(l_i, d_j))} = \frac{p(e_{l_i-d_j} = 1)}{p(e_{l_i-d_j} = 0)} \prod_{m_\delta \in CN(l_i, d_j)} \frac{p(m_\delta | e_{l_i-d_j} = 1)}{p(m_\delta | e_{l_i-d_j} = 0)}, \quad (3)$$

where  $p(m_\delta | e_{l_i-d_j}=1)$  and  $p(m_\delta | e_{l_i-d_j}=0)$  are the conditional probabilities of a node  $m_\delta$  belonging to  $CN(l_i, d_j)$ ; they represent the possibilities of whether the node is a common neighboring node between

$l_i$  and  $d_j$  in  $GN_1$  or not, respectively. Moreover, according to Bayesian theory, these two conditional probabilities can be expressed as:

$$p(m_\delta | e_{l_i-d_j} = 1) = \frac{p(e_{l_i-d_j} = 1 | m_\delta) p(m_\delta)}{p(e_{l_i-d_j} = 1)} \quad (4)$$

$$p(m_\delta | e_{l_i-d_j} = 0) = \frac{p(e_{l_i-d_j} = 0 | m_\delta) p(m_\delta)}{p(e_{l_i-d_j} = 0)}, \quad (5)$$

where  $p(e_{l_i-d_j}=1|m_\delta)$  and  $p(e_{l_i-d_j}=0|m_\delta)$  represent the conditional probability of whether the lncRNA node  $l_i$  is connected to the disease node  $d_j$  or not, respectively, and  $m_\delta$  is one of the common neighboring nodes between  $l_i$  and  $d_j$  in  $GN_1$ . Thus,  $p(e_{l_i-d_j}=1|m_\delta)$  and  $p(e_{l_i-d_j}=0|m_\delta)$  are calculated via the following formulas:

$$p(e_{l_i-d_j} = 1 | m_\delta) = \frac{N_{m_\delta}^+}{N_{m_\delta}^+ + N_{m_\delta}^-} \quad (6)$$

$$p(e_{l_i-d_j} = 0 | m_\delta) = \frac{N_{m_\delta}^-}{N_{m_\delta}^+ + N_{m_\delta}^-}, \quad (7)$$

- 3 where  $N_{m_\delta}^+$  and  $N_{m_\delta}^-$  denote the number of known and unknown associations between lncRNAs and
- 4 diseases whose common neighbors include  $m_\delta$  respectively.

Hence, from Equations (4) and (5), Equation (3) can be modified as follows:

$$S1(l_i, d_j) = \frac{p(e_{l_i-d_j} = 1)}{p(e_{l_i-d_j} = 0)} \prod_{m_\delta \in CN(l_i, d_j)} \frac{p(e_{l_i-d_j} = 0) p(e_{l_i-d_j} = 1 | m_\delta)}{p(e_{l_i-d_j} = 1) p(e_{l_i-d_j} = 0 | m_\delta)}. \quad (8)$$

Moreover, given any two nodes  $l_i$  and  $d_j$  in  $GN_1$ , the value of  $\frac{p(e_{l_i-d_j}=1)}{p(e_{l_i-d_j}=0)}$  is a constant, which we denote as  $\phi_m$  for convenience. Additionally, for each common neighboring node between  $l_i$  and  $d_j$  in  $GN_1$ , let  $N_l$  denote the number of lncRNAs directly related to  $m_\delta$ , and  $N_d$  denote the number of diseases directly related to  $m_\delta$ . Then,  $N_{m_\delta}^+ + N_{m_\delta}^- = N_l \times N_d$ , and hence, Equation (3) can further be modified as follows:

$$S1(l_i, d_j) = \phi_m \prod_{m_\delta \in CN(l_i, d_j)} \phi_m^{-1} \frac{N_{m_\delta}^+}{N_{m_\delta}^-}. \quad (9)$$

Considering that  $N_{m_\delta}^+$  may equal zero, we will introduce the Laplace calibration to guarantee that the value of  $S1(l_i, d_j)$  will not be zero:

$$S1(l_i, d_j) = \phi_m \prod_{m_\delta \in CN(l_i, d_j)} \phi_m^{-1} \frac{N_{m_\delta}^+ + 1}{N_{m_\delta}^- + 1}. \quad (10)$$

Furthermore, by introducing the logarithmic function for standardization, for any given lncRNA node  $l_i$  and disease node  $d_j$  in  $GN_1$ , we can finally define the probability of a potential association existing between them as:

$$S1'(l_i, d_j) = \frac{\log(S1(l_i, d_j))}{\lambda}, \quad (11)$$

- 5 where,  $\lambda$  is a constant utilized for normalization.

## 6 1.2. Method for Applying the Naïve Bayesian Theory to $GN_2$

- 7 In the same manner as described in section 1.1, for any given lncRNA node  $l_i$  and
- 8 disease node  $d_j$  in  $GN_2$ , we construct the set consisting of all common neighboring nodes,
- 9  $CN'(l_i, d_j) = \{m_1, m_2, \dots, m_h, g_1, g_2, \dots, g_u\}$ . Then, the posterior probabilities of  $p'(e_{l_i-d_j}=1|CN'(l_i, d_j))$

10 and  $p'(e_{l_i-d_j}=0|CN'(l_i, d_j))$ , representing whether the node  $l_i$  is connected to  $d_j$  in  $GN_2$  or not,  
 11 respectively, can be described as follows:

$$\begin{aligned} p'(e_{l_i-d_j}=1|CN'(l_i, d_j)) &= \frac{p'(m_1, m_2, \dots, m_h, g_1, g_2, \dots, g_u | e_{l_i-d_j}=1) p'(e_{l_i-d_j}=1)}{p'(CN'(l_i, d_j))} \\ &= \frac{p'(e_{l_i-d_j}=1)}{p'(CN'(l_i, d_j))} \prod_{m_\alpha \in CN'(l_i, d_j)} p'(m_\alpha | e_{l_i-d_j}=1) \times \\ &\quad \prod_{g_\beta \in CN'(l_i, d_j)} p'(g_\beta | e_{l_i-d_j}=1) \times \prod_{m_{\bar{\alpha}}, g_{\bar{\beta}} \in CN'(l_i, d_j)} p'(m_{\bar{\alpha}}, g_{\bar{\beta}} | e_{l_i-d_j}=1) \end{aligned} \quad (12)$$

$$\begin{aligned} p'(e_{l_i-d_j}=0|CN'(l_i, d_j)) &= \frac{p'(m_1, m_2, \dots, m_h, g_1, g_2, \dots, g_u | e_{l_i-d_j}=0) p'(e_{l_i-d_j}=0)}{p'(CN'(l_i, d_j))} \\ &= \frac{p'(e_{l_i-d_j}=0)}{p'(CN'(l_i, d_j))} \prod_{m_\alpha \in CN'(l_i, d_j)} p'(m_\alpha | e_{l_i-d_j}=0) \times \\ &\quad \prod_{g_\beta \in CN'(l_i, d_j)} p'(g_\beta | e_{l_i-d_j}=0) \times \prod_{m_{\bar{\alpha}}, g_{\bar{\beta}} \in CN'(l_i, d_j)} p'(m_{\bar{\alpha}}, g_{\bar{\beta}} | e_{l_i-d_j}=0), \end{aligned} \quad (13)$$

12 where  $p'(m_\alpha | e_{l_i-d_j}=1)$  and  $p'(m_\alpha | e_{l_i-d_j}=0)$  are the conditional probabilities of whether a node  
 13  $m_\alpha$  belongs to  $CN'(l_i, d_j)$ ; they represent the possibilities of whether the node  $m_\alpha$  is a common  
 14 neighboring node between  $l_i$  and  $d_j$  in  $GN_2$  or not, respectively.  $p'(g_\beta | e_{l_i-d_j}=1)$  and  $p'(g_\beta | e_{l_i-d_j}=0)$   
 15 are the conditional probabilities of whether a node  $g_\beta$  belonging to  $CN'(l_i, d_j)$ ; they represent the  
 16 possibilities of whether the node  $g_\beta$  is a common neighboring node between  $l_i$  and  $d_j$  in  $GN_2$  or not,  
 17 respectively.

Following the example of Equations (4) and (5), we have:

$$p'(m_\alpha | e_{l_i-d_j}=1) = \frac{p'(e_{l_i-d_j}=1 | g_\alpha) p'(g_\alpha)}{p'(e_{l_i-d_j}=1)} \quad (14)$$

$$p'(g_\alpha | e_{l_i-d_j}=0) = \frac{p'(e_{l_i-d_j}=0 | g_\alpha) p'(g_\alpha)}{p'(e_{l_i-d_j}=0)} \quad (15)$$

$$p'(g_\beta | e_{l_i-d_j}=1) = \frac{p'(e_{l_i-d_j}=1 | g_\beta) p'(g_\beta)}{p'(e_{l_i-d_j}=1)} \quad (16)$$

$$p'(g_\beta | e_{l_i-d_j}=0) = \frac{p'(e_{l_i-d_j}=0 | g_\beta) p'(g_\beta)}{p'(e_{l_i-d_j}=0)} \quad (17)$$

$$p'(m_{\bar{\alpha}}, g_{\bar{\beta}} | e_{l_i-d_j}=1) = \frac{p'(e_{l_i-d_j}=1 | m_{\bar{\alpha}}, g_{\bar{\beta}}) p'(m_{\bar{\alpha}}, g_{\bar{\beta}})}{p'(e_{l_i-d_j}=1)} \quad (18)$$

$$p'(m_{\bar{\alpha}}, g_{\bar{\beta}} | e_{l_i-d_j}=0) = \frac{p'(e_{l_i-d_j}=0 | m_{\bar{\alpha}}, g_{\bar{\beta}}) p'(m_{\bar{\alpha}}, g_{\bar{\beta}})}{p'(e_{l_i-d_j}=0)}, \quad (19)$$

where  $p'(e_{l_i-d_j}=1 | m_{\bar{\alpha}}, g_{\bar{\beta}})$  and  $p'(e_{l_i-d_j}=0 | m_{\bar{\alpha}}, g_{\bar{\beta}})$  represent the conditional probability of whether the lncRNA node  $l_i$  is connected to the disease node  $d_j$  or not respectively, while both  $m_{\bar{\alpha}}$  and  $g_{\bar{\beta}}$  are common neighboring nodes between  $l_i$  and  $d_j$  in  $GN_2$ . Moreover, let  $N_{m_{\bar{\alpha}}, g_{\bar{\beta}}}^+$  and  $N_{m_{\bar{\alpha}}, g_{\bar{\beta}}}^-$  denote the number of known and unknown associations between  $l_i$  and  $d_j$  in  $GN_2$ , respectively, conditional on  $m_{\bar{\alpha}}$  and  $g_{\bar{\beta}}$  being common neighboring nodes between  $l_i$  and  $d_j$  in  $GN_2$  and  $m_{\bar{\alpha}}-g_{\bar{\beta}}$  is an miRNA-gene

pair. In addition, for any given miRNA–gene pair  $m_{\bar{\alpha}}-g_{\bar{\beta}}$ , let  $N'_{l_1}$  denote the number of lncRNAs directly related to  $m_{\bar{\alpha}}-g_{\bar{\beta}}$ , and  $N'_{d_1}$  denote the number of diseases directly related to  $m_{\bar{\alpha}}-g_{\bar{\beta}}$ ; then,  $N_{m_{\bar{\alpha}},g_{\bar{\beta}}}^+ + N_{m_{\bar{\alpha}},g_{\bar{\beta}}}^- = N'_{l_1} \times N'_{d_1}$  and  $p'(e_{l_i-d_j}=1|m_{\bar{\alpha}},g_{\bar{\beta}}) + p'(e_{l_i-d_j}=0|m_{\bar{\alpha}},g_{\bar{\beta}})=1$ . Therefore, we have:

$$p'(e_{l_i-d_j}=1|m_{\bar{\alpha}},g_{\bar{\beta}}) = \frac{N_{m_{\bar{\alpha}},g_{\bar{\beta}}}^+}{N_{m_{\bar{\alpha}},g_{\bar{\beta}}}^+ + N_{m_{\bar{\alpha}},g_{\bar{\beta}}}^-}. \quad (20)$$

$$p'(e_{l_i-d_j}=0|m_{\bar{\alpha}},g_{\bar{\beta}}) = \frac{N_{m_{\bar{\alpha}},g_{\bar{\beta}}}^-}{N_{m_{\bar{\alpha}},g_{\bar{\beta}}}^+ + N_{m_{\bar{\alpha}},g_{\bar{\beta}}}^-}. \quad (21)$$

As illustrated in Section 1.1, we can define the probability of a potential association existing between  $l_i$  and  $d_j$  in  $GN_2$  as follows:

$$S2(l_i, d_j) = \phi_m \prod_{m_{\alpha} \in CN'(l_i, d_j)} \prod_{g_{\beta} \in CN'(l_i, d_j)} \prod_{m_{\bar{\alpha}}, g_{\bar{\beta}} \in CN'(l_i, d_j)} \phi_m^{-3} \frac{(N_{m_{\alpha}}^+ + 1)(N_{g_{\beta}}^+ + 1)(N_{m_{\bar{\alpha}}, g_{\bar{\beta}}}^+ + 1)}{(N_{m_{\alpha}}^- + 1)(N_{g_{\beta}}^- + 1)(N_{m_{\bar{\alpha}}, g_{\bar{\beta}}}^- + 1)}, \quad (22)$$

where  $N_{m_{\alpha}}^+$  and  $N_{m_{\alpha}}^-$  denote the number of known and unknown associations between  $l_i$  and  $d_j$  in  $GN_2$  respectively, conditional on  $m_{\alpha}$  being a common neighboring node between  $l_i$  and  $d_j$ . In addition,  $N_{g_{\beta}}^+$  and  $N_{g_{\beta}}^-$  represent the number of known and unknown associations between  $l_i$  and  $d_j$  in  $GN_2$  respectively, conditional on  $g_{\beta}$  being a common neighboring node between  $l_i$  and  $d_j$ . From the above descriptions, we find  $N_{m_{\alpha}}^+ + N_{m_{\alpha}}^- = N'_{l_2} \times N'_{d_2}$  and  $N_{g_{\beta}}^+ + N_{g_{\beta}}^- = N'_{l_3} \times N'_{d_3}$ , where  $N'_{l_2}$  denotes the number of lncRNAs directly related to the node  $m_{\alpha}$  in  $GN_2$ ,  $N'_{d_2}$  denotes the number of diseases directly related to the node  $m_{\alpha}$  in  $GN_2$ ,  $N'_{l_3}$  denotes the number of lncRNAs directly related to the node  $g_{\beta}$  in  $GN_2$ , and  $N'_{d_3}$  denotes the number of diseases directly related to the node in  $GN_2$ .

Finally, following the example of Equation (11), we can finally define the probability of a potential association existing between  $l_i$  and  $d_j$  in  $GN_2$  as follows:

$$S2'(l_i, d_j) = \frac{\log(S2(l_i, d_j))}{\lambda}. \quad (23)$$
